# Supplementary material
Source: PubMed Central journal article supplement (PMC8669020)
Supplement: NIHMS1712663-supplement-Supplementary_Materials__figures__tables.pdf [file NIHMS1712663-supplement-Supplementary_Materials__figures__tables.pdf]

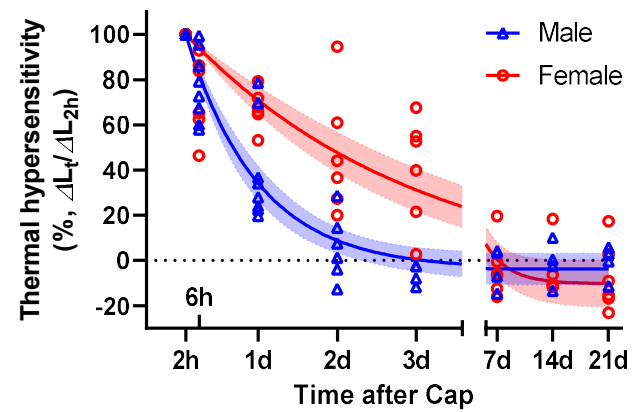

**Supplemental Fig. 1. Sex difference in the resolution time course of capsaicin-induced thermal hypersensitivity.** Curve fitting of capsaicin (Cap)-induced thermal hypersensitivity revealed slower resolution of the hypersensitivity in females than in males.  $\Delta L_t$ , the difference between withdrawal latencies at baseline and each time point;  $\Delta L_{2h}$ , the peak difference (100%) at 2 hr post-Cap. The shaded area indicates 95% confidence interval.

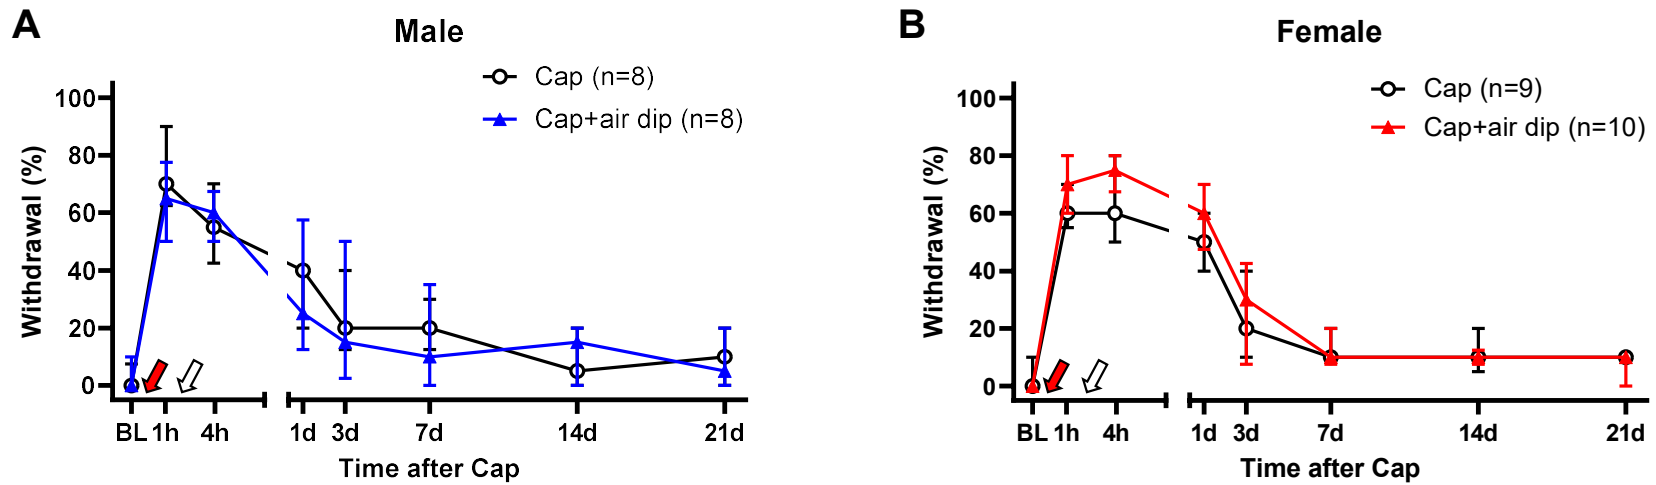

**Supplemental Fig. 2. Capsaicin-induced mechanical hypersensitivity is not affected by hindpaw immersing motion itself.** In both males (A) and females (B), the dipping motion (white arrow) of the capsaicin (Cap, red arrow)-injected hindpaw into an empty water bath does not affect the magnitude and time course of Cap-induced mechanical hypersensitivity. BL, baseline.
